# Supplementary material for: Nitrate-Induced CLE Peptide Systemically Inhibits Nodulation in Medicago truncatula
Source: MDPI journal article supplement (doi:10.3390/plants9111456), 2020-10-28
Supplement: s1 [file s1]

**Table S1.** Primer used for the expression analysis.

| gene            | Gene ID              | Forward primer                       | Reverse primer                        |
|-----------------|----------------------|--------------------------------------|---------------------------------------|
| <i>MtCLE 35</i> | <i>Medtr2g091125</i> | 5'- GCAAGCTCGTACTCTCCAAC C-3'        | 5'- TGTTGATTTGCATCCTCGTG-3'           |
| <i>MtCLE12</i>  | <i>Medtr4g079630</i> | 5'- CAACGTCTCTTGCATGAGTTA<br>ATGG-3' | 5'- ACCTGGTGAAAGCCTATCTCCT G-3'       |
| <i>MtCLE13*</i> | <i>Medtr4g079610</i> | 5'- CCGAAGCCTTCTACAGAAAC<br>ACG-3'   | 5'- TCTTGGTGGTGATCTTCCATTAT GC-<br>3' |

\*primer sequences for *MtCLE13* forward and reverse primer were used according to [12].

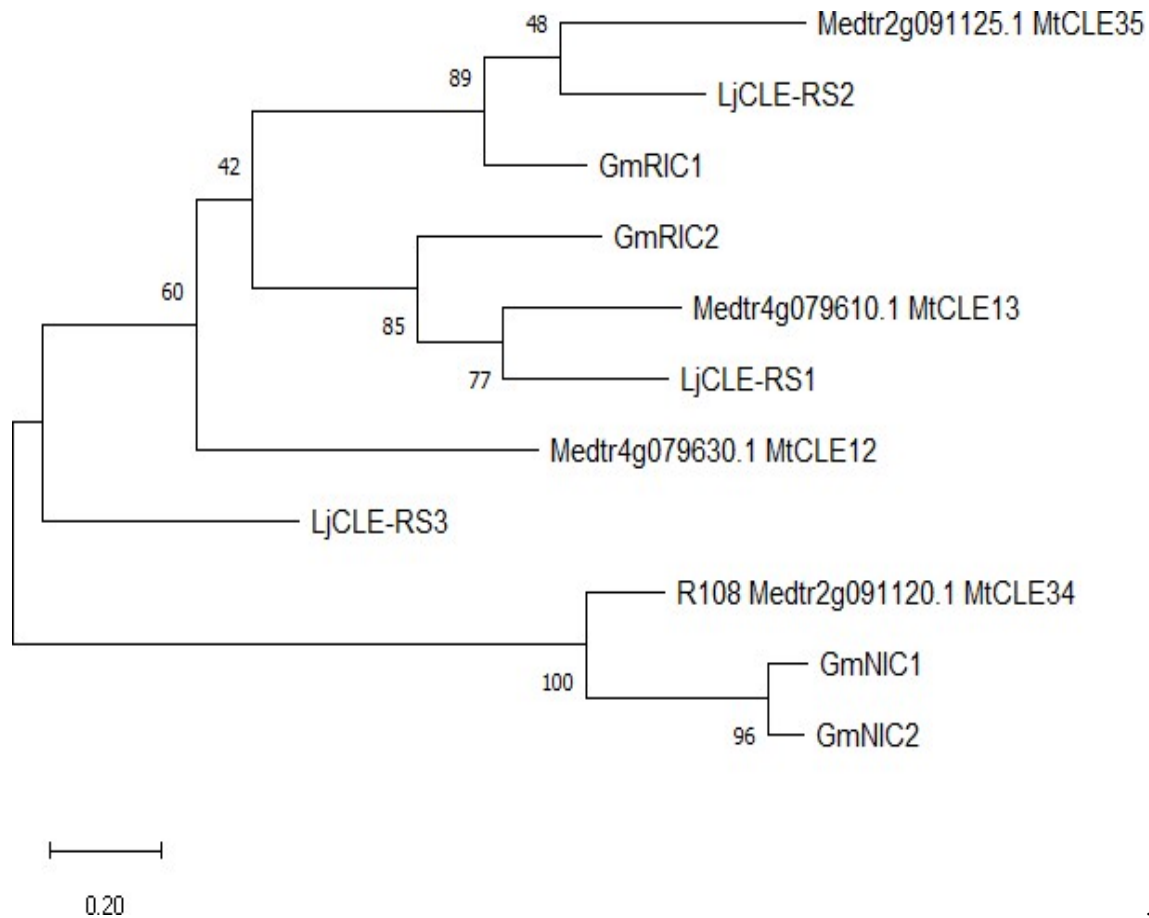

**Figure S1.** Phylogenetic tree based on the protein sequences of *CLE* genes of *Medicago truncatula*, *Lotus japonicus*, and *Glycine max*. The tree was generated using a maximum likelihood algorithm with 1000 bootstrap replicates.

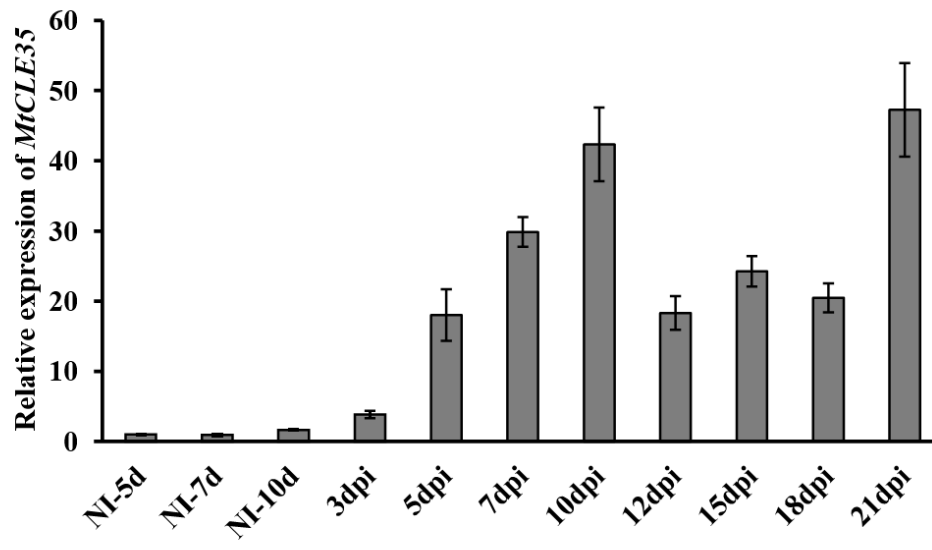

**Figure S2.** The expression levels of the *MtCLE35* gene at different days post inoculation (dpi) in comparison to the non-inoculated (NI) roots. Results are mean  $\pm$  SEM of three technical repeats of one biological repeat, representative for three independent experiments.

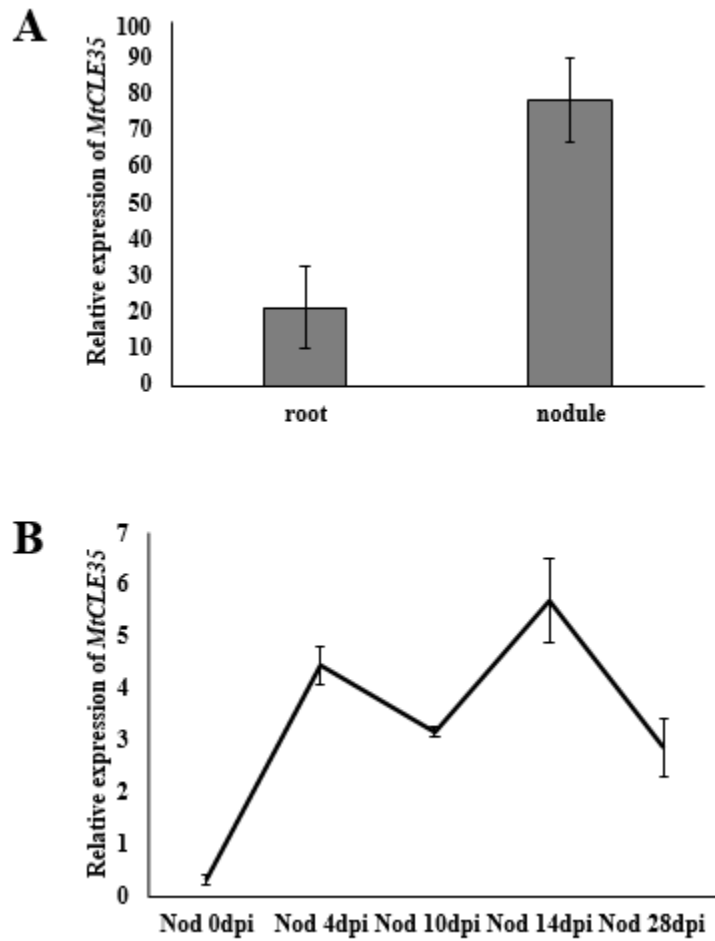

**Figure S3.** The expression levels of the *MtCLE35* gene in nodules in comparison with the root according to transcriptomic data obtained by LCM (Laser Capture Microdissection)-RNA-seq for *M. truncatula* (<https://iant.toulouse.inra.fr/symbimics>, [27]) (**A**), *MtCLE35* expression at 0, 4, 10, 14 and 28 dpi according to Small Secreted Peptide Gene Expression Atlas (SSP-GEA) available in The *Medicago truncatula* Small Secreted Peptide Database (<https://mtsspdb.noble.org/>, [28]) (**B**).

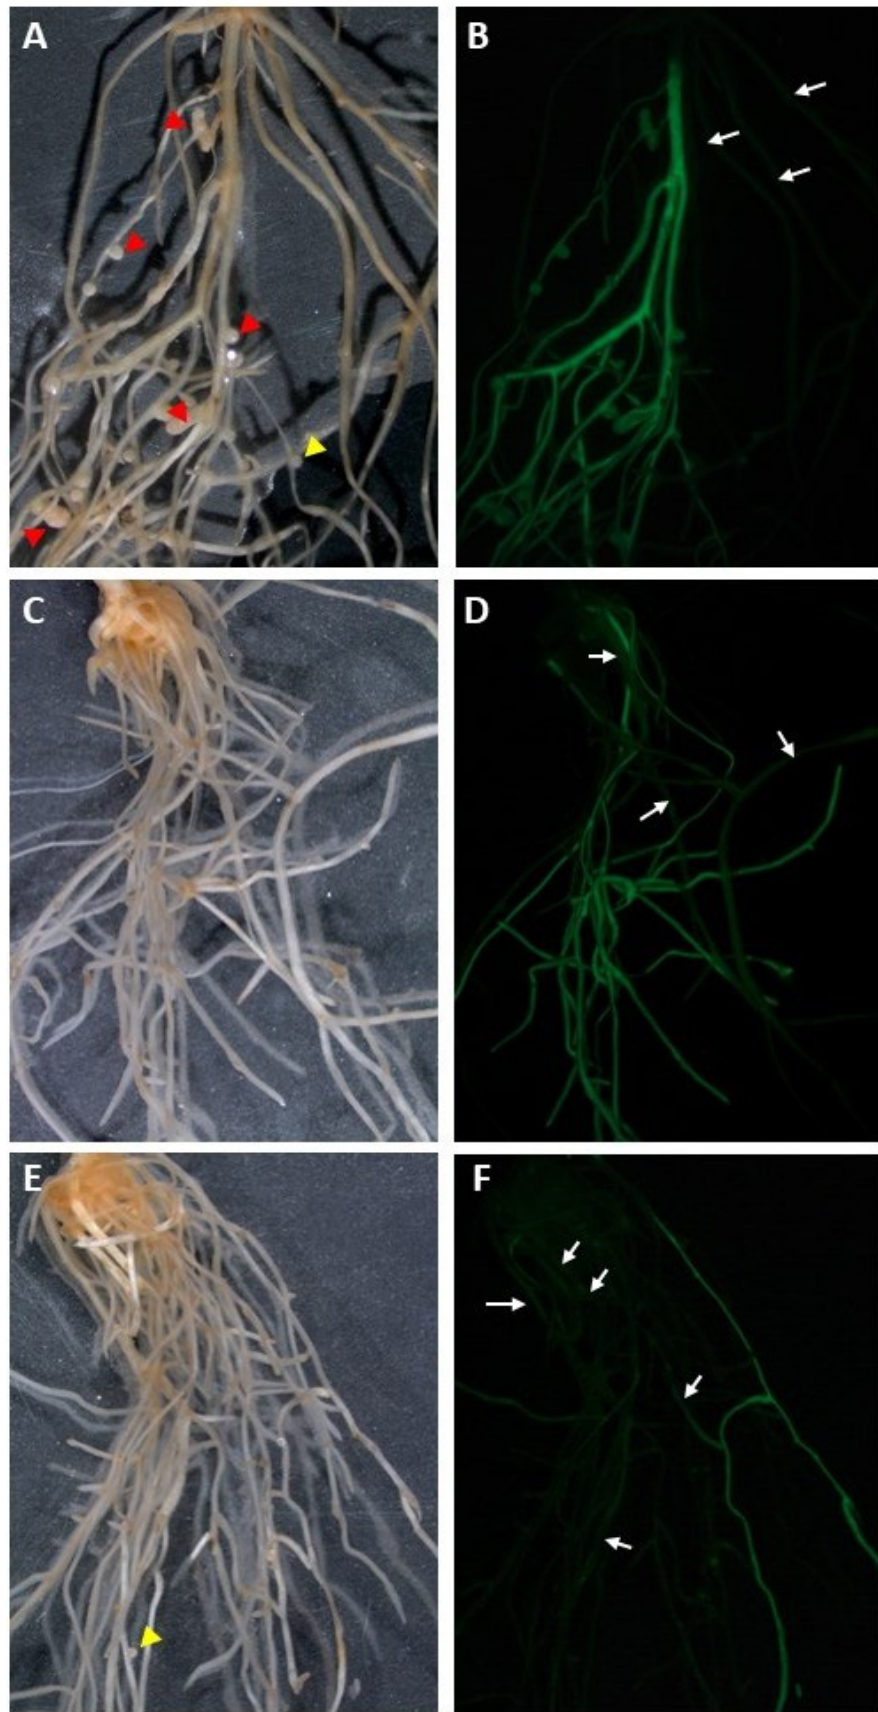

**Figure S4.** Examples of nodulation phenotypes of composite wild-type plants containing both transgenic GFP-positive control (*GUS* ( $\beta$ -glucuronidase)-overexpressing) (A and B) and *MtCLE35*-overexpressing (C-F) roots and non-transgenic GFP-negative roots. White arrows indicate non-transgenic GFP-negative roots exhibiting faint autofluorescence. Red arrows point at nodules on GFP-positive transgenic roots, yellow arrows point at nodules on GFP-negative non-transgenic roots.

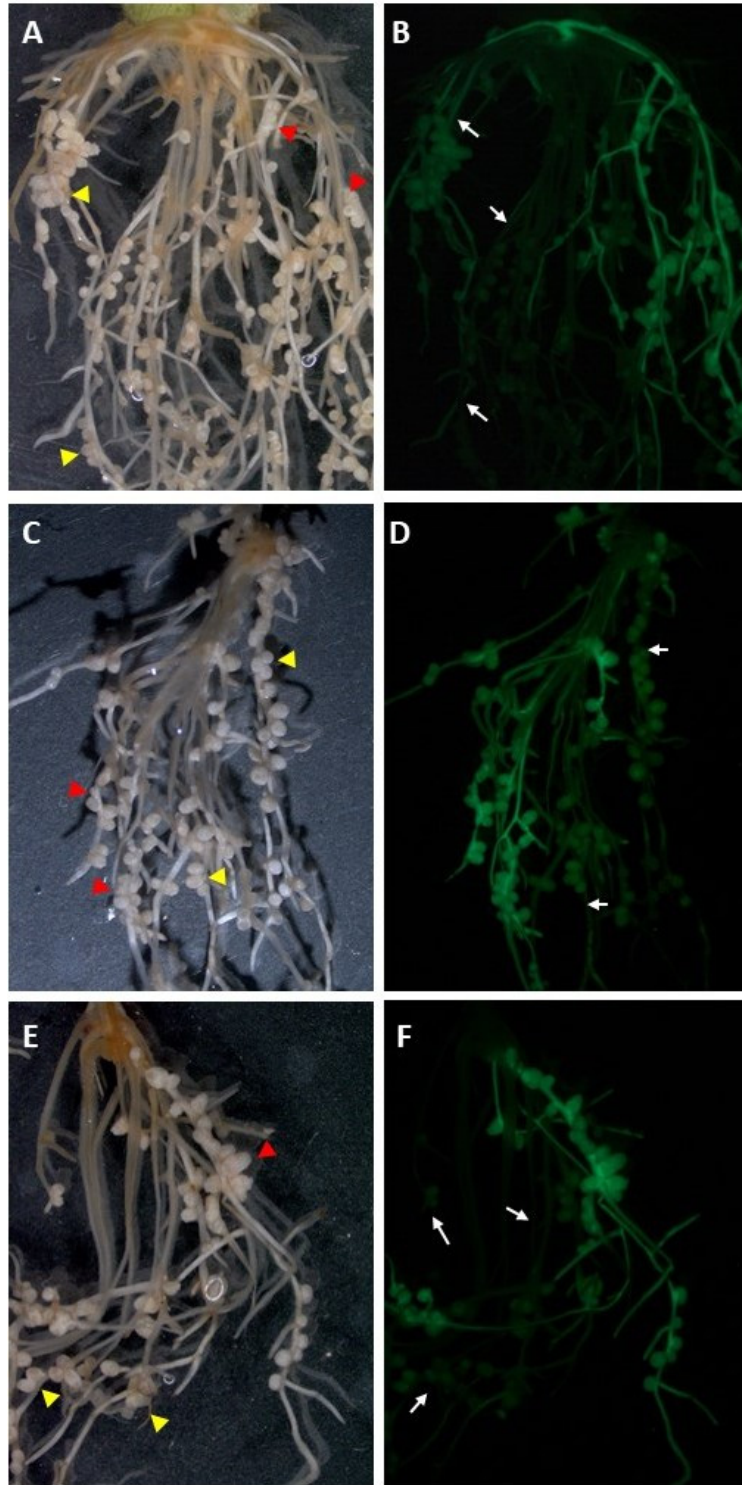

**Figure S5.** Examples of nodulation phenotypes of composite *sun1-4* mutant plants containing both transgenic GFP-positive control (*GUS*-overexpressing) (A and B) and *MtCLE35*-overexpressing (C-F) roots and non-transgenic GFP-negative roots. White arrows indicate non-transgenic GFP-negative roots exhibiting faint autofluorescence. Red arrows point at nodules on GFP-positive transgenic roots, yellow arrows point at nodules on GFP-negative non-transgenic roots.
